# Supplementary material for: Multi-Drug Resistant Escherichia coli, Biosecurity and Anti-Microbial Use in Live Bird Markets, Abeokuta, Nigeria
Source: MDPI journal article supplement (doi:10.3390/antibiotics11020253), 2022-02-16
Supplement: s1 [file s1]

**Table S1.****The Concentrations and Cut-Off Limits Used For Antimicrobials Susceptibility Testing.**

| <b>Name of antimicrobials</b> | <b>Class</b>     | <b>Concentration per disc (µg)</b> | <b>S</b> | <b>I</b> | <b>R</b> |
|-------------------------------|------------------|------------------------------------|----------|----------|----------|
| Ceftriaxone                   | Cephalosporins   | 10                                 | ≥19      | 20-22    | ≤23      |
| Cefixime                      |                  | 5                                  | ≥19      | 16-18    | ≤15      |
| Cefuroxime                    |                  | 30                                 | ≥23      | 15-22    | ≤14      |
| Ceftazidime                   |                  | 30                                 | ≥18      | 15-17    | ≤14      |
| Cefotaxime                    |                  | 25                                 | ≥19      | 20-22    | ≤23      |
| Nalidixic acid                | Fluoroquinolones | 30                                 | ≥19      | 14-18    | ≤13      |
| Ciprofloxacin                 |                  | 5                                  | ≥21      | 16-20    | ≤15      |
| Ofloxacin                     |                  | 5                                  | ≥16      | 13-15    | ≤12      |
| Levofloxacin                  |                  | 5                                  | ≥17      | 14-16    | ≤13      |
| Nitrofurantoin                | Nitrofurans      | 300                                | ≥17      | 15-16    | ≤14      |
| Ampiclox                      | Beta-lactamase   | 30                                 | ≤13      | 14-16    | ≥17      |
| Amoxicillin clavulanate       |                  | 30                                 | ≤13      | 14-17    | ≥18      |
| Imipinem                      | Carbapenem       | 10                                 | ≥23      | 20-22    | ≤19      |
| Gentamicin                    | Aminoglycosides  | 10                                 | ≥15      | 13-14    | ≤12      |

**Table S2**

**Antimicrobial Profile of the Positive *E. coli* Isolates from Live Birds Abeokuta Ogun State.**

|    | SAMPLE ID | MDR  | NF | CXM | CRO | ACX | ZEM | LBC | AUG | CTX | IMP | OFX | GN | NA | CAZ | CPR |
|----|-----------|------|----|-----|-----|-----|-----|-----|-----|-----|-----|-----|----|----|-----|-----|
| 1  | KT 1AE    | +VE  | R  | R   | S   | R   | S   | R   | R   | S   | R   | R   | S  | R  | R   | R   |
| 2  | KT 4AE    | - VE | I  | R   | S   | R   | S   | R   | S   | S   | R   | R   | S  | R  | R   | R   |
| 3  | ASEJ 3AE  | +VE  | R  | R   | R   | R   | S   | S   | R   | S   | R   | S   | R  | I  | R   | R   |
| 4  | IT 7AE    | +VE  | R  | R   | S   | R   | S   | S   | R   | R   | R   | S   | R  | R  | R   | R   |
| 5  | A1AE      | +VE  | R  | I   | S   | R   | S   | I   | I   | R   | R   | R   | R  | R  | R   | R   |
| 6  | OS1AE     | -VE  | I  | R   | S   | R   | S   | S   | I   | S   | R   | S   | S  | S  | R   | S   |
| 7  | OS3AE     | +VE  | I  | R   | S   | R   | S   | S   | R   | S   | R   | S   | R  | S  | R   | S   |
| 8  | IT 6AE    | +VE  | I  | I   | S   | R   | S   | S   | R   | S   | R   | S   | R  | S  | R   | S   |
| 9  | IT2AE     | -VE  | S  | I   | S   | S   | S   | R   | R   | S   | R   | S   | S  | I  | R   | R   |
| 10 | GB2AE     | +VE  | R  | R   | R   | R   | S   | S   | R   | I   | R   | S   | R  | R  | R   | R   |
| 11 | IT 8AE    | +VE  | R  | I   | S   | R   | S   | S   | R   | S   | R   | S   | S  | S  | R   | S   |
| 12 | A2AE      | -VE  | S  | I   | S   | S   | S   | S   | I   | S   | R   | S   | S  | S  | R   | S   |
| 13 | IT3AE     | +VE  | R  | R   | S   | R   | I   | S   | S   | S   | R   | S   | R  | R  | R   | S   |
| 14 | IT9AE     | -VE  | R  | S   | S   | R   | S   | S   | S   | S   | R   | S   | S  | R  | R   | S   |
| 15 | A3AE      | +VE  | R  | R   | S   | R   | S   | S   | R   | R   | R   | S   | S  | S  | R   | S   |
| 16 | IT 5AE    | +VE  | R  | R   | S   | S   | S   | S   | R   | S   | R   | S   | R  | I  | R   | S   |
| 17 | OS2AE     | +VE  | R  | R   | S   | S   | S   | S   | R   | R   | R   | S   | R  | S  | R   | R   |
| 18 | AS3AE     | +VE  | R  | R   | S   | S   | S   | I   | R   | S   | R   | S   | R  | R  | R   | R   |
| 19 | AS 4AE    | -VE  | S  | S   | S   | S   | S   | S   | S   | S   | R   | S   | R  | R  | R   | R   |
| 20 | IT4AE     | +VE  | R  | R   | R   | S   | S   | S   | R   | S   | R   | S   | R  | R  | R   | R   |
| 21 | OS6AE     | -VE  | S  | R   | S   | R   | R   | S   | I   | R   | R   | S   | R  | I  | R   | S   |
| 22 | L 1AE     | -VE  | S  | S   | S   | S   | S   | S   | S   | S   | S   | S   | S  | S  | S   | S   |
| 23 | IT1AE     | -VE  | R  | S   | S   | S   | S   | R   | S   | S   | R   | S   | S  | S  | R   | S   |
| 24 | OS 5AE    | +VE  | R  | R   | S   | R   | S   | S   | R   | R   | R   | S   | R  | R  | R   | I   |
| 25 | AS1AE     | +VE  | S  | S   | S   | R   | S   | S   | R   | S   | R   | S   | R  | S  | R   | S   |
| 26 | L3AE      | -VE  | S  | I   | S   | S   | S   | I   | S   | S   | R   | S   | S  | R  | R   | S   |
| 27 | KT2AE     | +VE  | R  | R   | S   | R   | S   | S   | R   | S   | R   | I   | R  | R  | R   | R   |
| 28 | L 2AE     | -VE  | R  | S   | S   | S   | S   | S   | I   | I   | S   | S   | S  | S  | R   | S   |

|    | SAMPLE ID | MDR  | NF | CXM | CRO | ACX | ZEM | LBC | AUG | CTX | IMP | OFX | GN | NA | CAZ | CPR |
|----|-----------|------|----|-----|-----|-----|-----|-----|-----|-----|-----|-----|----|----|-----|-----|
| 29 | AS2AE     | -VE  | R  | S   | S   | S   | S   | S   | R   | I   | I   | S   | S  | R  | R   | I   |
| 30 | ASEJ 1AE  | -VE  | R  | R   | S   | S   | S   | S   | I   | R   | R   | S   | S  | S  | R   | S   |
| 31 | ASEJ 2AE  | +VE  | R  | R   | S   | R   | R   | S   | R   | R   | R   | S   | R  | R  | R   | I   |
| 32 | KT3AE     | -VE+ | S  | S   | S   | S   | S   | S   | S   | S   | R   | S   | S  | R  | R   | I   |
